# Supplementary material
Source: PubMed Central journal article supplement (PMC2732315)
Supplement: btp273_1.pdf [file btp273_1.pdf]

# Supplemental Material for “Pairagon: A Highly Accurate, HMM-based cDNA-to-Genome Aligner”

David V. Lu, et al.

April 13, 2009

Note: All alignments for these experiments are available online at  
<http://mblab.wustl.edu/software/pairagon>

## 1 Experiment 1 Results for All Aligners

| D           | 0.00  | 0.01  | 0.02  | 0.03  | 0.04  | 0.05  | 0.06  | 0.07  | 0.08  | 0.09  |
|-------------|-------|-------|-------|-------|-------|-------|-------|-------|-------|-------|
| Identity    | 1.000 | 0.995 | 0.990 | 0.984 | 0.981 | 0.976 | 0.972 | 0.968 | 0.965 | 0.962 |
| Blat        | 97.5  | 94.2  | 92.6  | 89.1  | 85.5  | 83.4  | 80.4  | 79.0  | 76.2  | 75.0  |
| BlatX       | 96.7  | 91.3  | 88.3  | 83.7  | 78.3  | 74.6  | 70.5  | 67.7  | 64.0  | 60.6  |
| Est2Genome  | 93.5  | 92.1  | 91.1  | 89.2  | 87.9  | 87.5  | 85.9  | 84.8  | 85.0  | 82.8  |
| Est2Genome+ | 95.7  | 93.1  | 91.9  | 88.8  | 85.6  | 86.4  | 82.7  | 81.4  | 80.3  | 79.0  |
| Exalin      | 97.5  | 96.1  | 95.4  | 93.4  | 92.5  | 92.3  | 91.0  | 90.3  | 90.1  | 88.0  |
| Exonerate   | 95.9  | 93.9  | 92.7  | 89.4  | 88.6  | 86.9  | 86.1  | 85.0  | 83.5  | 82.3  |
| ExonerateCG | 97.2  | 95.4  | 94.7  | 92.3  | 90.0  | 89.9  | 88.7  | 87.9  | 86.8  | 86.0  |
| ExonerateDG | 96.9  | 95.2  | 94.2  | 92.1  | 90.3  | 90.3  | 88.6  | 88.0  | 86.8  | 86.2  |
| GMap        | 95.9  | 94.4  | 93.5  | 91.7  | 90.3  | 90.3  | 89.3  | 87.1  | 88.0  | 87.1  |
| GeneSeqer   | 92.5  | 90.5  | 89.8  | 87.9  | 86.0  | 86.2  | 85.2  | 83.5  | 83.0  | 82.6  |
| Pairagon    | 99.6  | 98.4  | 98.5  | 97.3  | 96.9  | 96.5  | 95.9  | 96.5  | 95.6  | 95.9  |
| PairagonX   | 98.8  | 97.7  | 97.9  | 96.2  | 95.9  | 95.1  | 94.8  | 95.4  | 94.1  | 94.5  |
| Palma       | 98.7  | 96.2  | 95.2  | 91.3  | 89.2  | 87.5  | 86.1  | 84.2  | 83.7  | 81.7  |
| Sim4        | 96.0  | 94.5  | 93.5  | 91.8  | 90.9  | 89.4  | 88.6  | 88.2  | 86.1  | 85.7  |
| Sim4+       | 97.4  | 95.6  | 94.3  | 92.8  | 90.9  | 88.9  | 87.8  | 87.3  | 85.6  | 84.8  |
| Spaln       | 97.8  | 96.8  | 96.7  | 94.6  | 94.6  | 93.6  | 92.5  | 93.6  | 93.1  | 92.5  |
| SpalnX      | 97.0  | 95.7  | 95.8  | 94.1  | 93.7  | 93.1  | 92.4  | 92.7  | 92.5  | 91.4  |
| Spidey      | 89.2  | 83.2  | 80.7  | 77.6  | 69.9  | 69.3  | 66.1  | 64.9  | 61.1  | 58.9  |
| SpideyX     | 29.7  | 28.9  | 28.1  | 27.0  | 26.4  | 26.2  | 25.8  | 25.7  | 25.4  | 24.8  |
| Splign      | 97.2  | 96.1  | 95.7  | 94.3  | 93.9  | 93.2  | 92.6  | 92.6  | 92.5  | 91.7  |
| SplignX     | 97.1  | 96.0  | 95.7  | 94.0  | 93.7  | 92.9  | 92.7  | 92.4  | 92.6  | 91.9  |
| Xat         | 94.0  | 92.4  | 91.5  | 89.9  | 88.2  | 88.5  | 86.8  | 86.2  | 85.1  | 85.3  |

| D Identity  | 0.00 | 0.1  | 0.2  | 0.3  | 0.4  | 0.5  | 0.6  | 0.7  |
|-------------|------|------|------|------|------|------|------|------|
| Blat        | 97.5 | 72.3 | 50.2 | 34.8 | 8.4  | 0.2  | 0.0  | 0.0  |
| BlatX       | 96.7 | 55.9 | 27.4 | 12.7 | 2.4  | 0.1  | 0.0  | 0.0  |
| Est2Genome  | 93.5 | 82.4 | 70.7 | 62.1 | 55.3 | 46.4 | 42.5 | 35.1 |
| Est2Genome+ | 95.7 | 77.5 | 60.9 | 49.5 | 40.4 | 31.0 | 25.7 | 19.0 |
| Exalin      | 97.5 | 87.4 | 77.2 | 70.3 | 63.6 | 54.8 | 49.4 | 42.1 |
| Exonerate   | 95.9 | 81.0 | 65.8 | 55.7 | 48.1 | 37.5 | 29.9 | 24.4 |
| ExonerateCG | 97.2 | 84.9 | 70.8 | 60.6 | 51.0 | 39.6 | 32.3 | 27.0 |
| ExonerateDG | 96.9 | 84.6 | 71.8 | 60.9 | 50.5 | 39.8 | 32.6 | 27.0 |
| GMap        | 95.9 | 86.3 | 76.4 | 64.8 | 55.9 | 42.1 | 32.2 | 20.1 |
| GeneSeqer   | 92.5 | 81.7 | 67.7 | 57.4 | 50.1 | 41.7 | 35.4 | 30.5 |
| Pairagon    | 99.6 | 95.0 | 89.7 | 84.8 | 81.0 | 72.1 | 65.7 | 58.6 |
| PairagonX   | 98.8 | 93.5 | 87.7 | 82.4 | 78.7 | 70.4 | 66.4 | 63.4 |
| Palma       | 98.7 | 80.5 | 60.2 | 46.9 | 35.0 | 25.7 | 10.0 | 12.0 |
| Sim4        | 96.0 | 84.7 | 72.6 | 60.1 | 44.2 | 25.9 | 12.7 | 4.5  |
| Sim4+       | 97.4 | 83.6 | 68.8 | 55.7 | 40.5 | 23.5 | 11.5 | 4.2  |
| Spaln       | 97.8 | 92.3 | 84.4 | 78.2 | 75.3 | 64.1 | 60.2 | 54.9 |
| SpalnX      | 97.0 | 91.0 | 83.2 | 78.4 | 74.9 | 66.6 | 63.9 | 59.3 |
| Spidey      | 89.2 | 53.9 | 33.0 | 22.3 | 12.8 | 7.8  | 4.2  | 1.8  |
| SpideyX     | 29.7 | 23.8 | 19.8 | 16.7 | 12.9 | 11.0 | 8.1  | 7.3  |
| Splign      | 97.2 | 91.7 | 78.2 | 55.4 | 30.6 | 11.5 | 4.0  | 1.5  |
| SplignX     | 97.1 | 91.9 | 82.8 | 76.8 | 71.0 | 60.5 | 52.4 | 38.8 |
| Xat         | 94.0 | 83.2 | 73.9 | 65.1 | 59.9 | 51.7 | 47.8 | 43.8 |

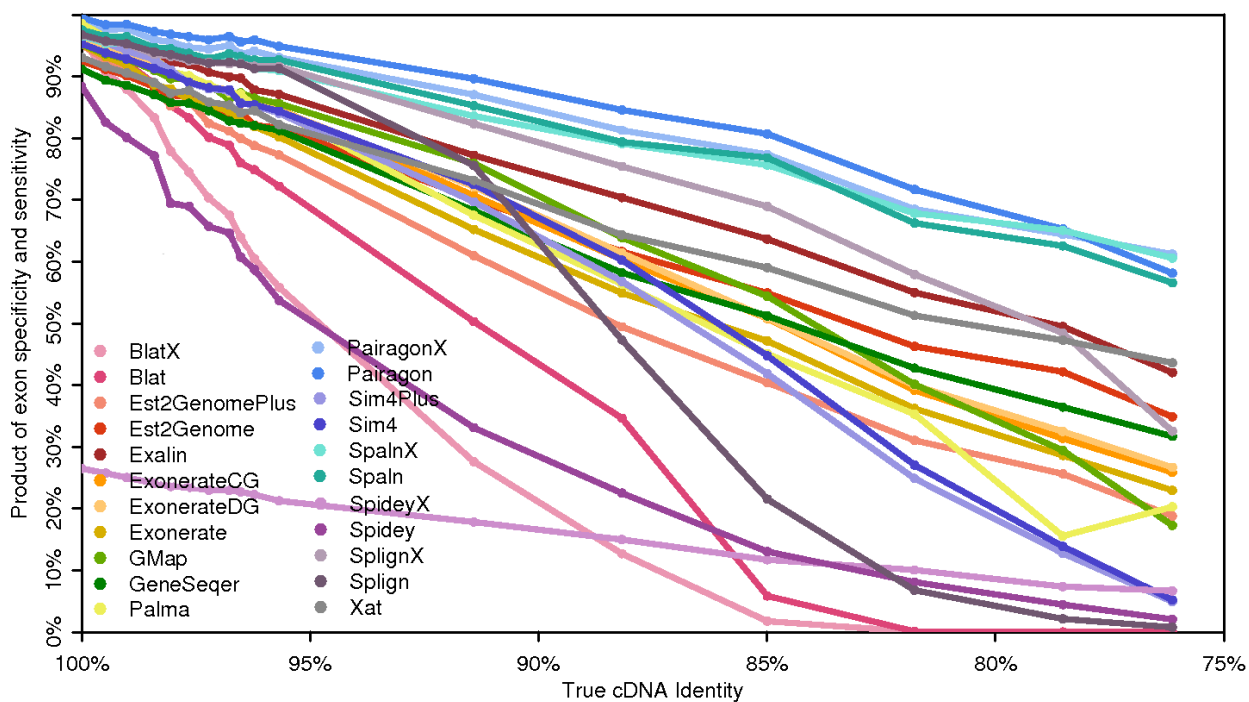

## 2 Experiment 2 Results for All Aligners

| D           | 0     | 0.1   | 0.2   | 0.3   | 0.4   | 0.5   | 0.6   |
|-------------|-------|-------|-------|-------|-------|-------|-------|
| Identity    | 0.998 | 0.946 | 0.901 | 0.859 | 0.829 | 0.789 | 0.761 |
| Blat        | 97.0  | 68.0  | 45.9  | 30.5  | 10.3  | 0.4   | 0.0   |
| BlatX       | 95.1  | 46.9  | 20.8  | 8.1   | 1.8   | 0.1   | 0.0   |
| Est2Genome  | 94.4  | 82.0  | 71.9  | 64.4  | 57.7  | 50.8  | 45.1  |
| Est2Genome+ | 95.0  | 75.3  | 60.9  | 50.2  | 42.5  | 35.8  | 28.7  |
| Exalin      | 97.6  | 89.2  | 82.1  | 75.5  | 68.7  | 63.6  | 58.3  |
| Exonerate   | 95.3  | 83.6  | 73.4  | 63.6  | 53.1  | 44.4  | 31.7  |
| ExonerateCG | 96.1  | 81.3  | 70.3  | 57.1  | 47.1  | 36.3  | 24.3  |
| ExonerateDG | 95.9  | 82.4  | 71.1  | 58.4  | 49.1  | 38.1  | 25.9  |
| GMap        | 91.6  | 83.4  | 75.4  | 68.1  | 58.2  | 45.2  | 28.4  |
| GeneSeqer   | 72.7  | 64.0  | 56.7  | 49.2  | 42.5  | 35.7  | 29.5  |
| Pairagon    | 98.9  | 92.9  | 87.7  | 83.6  | 79.3  | 75.2  | 68.7  |
| PairagonX   | 98.9  | 92.9  | 87.7  | 84.5  | 81.1  | 77.7  | 73.9  |
| Palma       | 98.4  | 79.2  | 60.9  | 46.8  | 33.1  | 22.9  | 14.6  |
| Sim4        | 93.3  | 81.0  | 69.2  | 58.2  | 44.2  | 30.4  | 15.7  |
| Sim4+       | 93.9  | 80.5  | 67.8  | 56.1  | 42.0  | 28.8  | 15.0  |
| Spaln       | 97.6  | 88.5  | 81.0  | 75.5  | 71.7  | 65.9  | 62.9  |
| SpalnX      | 97.1  | 88.0  | 81.0  | 76.2  | 71.3  | 66.1  | 62.0  |
| Spidey      | 92.4  | 55.1  | 31.8  | 19.2  | 10.1  | 5.2   | 2.7   |
| SpideyX     | 72.2  | 59.0  | 48.4  | 39.5  | 33.1  | 27.6  | 20.5  |
| Splign      | 97.4  | 86.4  | 58.8  | 15.8  | 3.6   | 1.3   | 0.3   |
| SplignX     | 97.2  | 88.3  | 80.6  | 74.4  | 67.1  | 55.6  | 42.0  |
| Xat         | 93.1  | 83.0  | 75.4  | 69.5  | 63.5  | 58.6  | 52.5  |

## 3 Error Classifications

### 3.1 Method

The method we used to classify errors is similar to the way that alternate splicing patterns are classified (Cite Guigo), except instead of comparing two plausible gene structures, we are comparing the reference gene annotation to the gene annotation produced by the alignment. The nucleotides of each exon are marked with ‘1’ and everywhere else is marked with ‘0’. The binary representation of the annotation is placed above the representation for the alignment. Repeat alignment columns are then elided.

A finite state machine then processes the columns to determine what sorts of errors occur. Any place where the numbers within the column do not match indicate the presence of some sort of error. The patterns that the finite state machine recognizes are enumerated below.

### 3.2 Gene Structure Errors

Gene structure errors are noted by either an exon or intron that is completely wrong, i.e. no part of it maps to a correct exon or intron.

| Pattern | Name             | Notes                                                                                                                                                                       |
|---------|------------------|-----------------------------------------------------------------------------------------------------------------------------------------------------------------------------|
|         | Missing Exon     | Similar patterns exist for missing 5' and 3' exons. If the missing exon is less than 30 bases long, it is reclassified as a Missing Microexon.                              |
|         | Extra Exon       | This occurs when the alignment contains an exon that is not found in the annotation, and is surrounded by valid exons.                                                      |
|         | Missing Intron   | This occurs when the aligner merges two exons and marks the intron as a large gap.                                                                                          |
|         | Extra Intron     | This occurs when an intron is placed in the middle of an exon, usually resulting from a large gap.                                                                          |
|         | Shifted Exon     | This occurs when an exon only found in the reference annotation is adjacent to an exon that only occurs in the alignment. This only counts as one error.                    |
|         | Assimilated Exon | This occurs when an exon is 'assimilated' into another exon, such that the one exon is missing and the other has an incorrect boundary. This also just counts as one error. |
|         | Add and Shift    | This is the reverse of an assimilated exon, occurring when an exon is split into two separate pieces, one of which does not overlap the original exon.                      |

### 3.3 Transcript Boundary Errors

Transcript boundary errors encapsulate errors where the first or last exon is partially correct and the outermost boundary (i.e. the transcript start or transcript finish) is incorrect.

| Pattern | Name                         | Notes                                                                    |
|---------|------------------------------|--------------------------------------------------------------------------|
|         | Missing Start/Missing Finish | One end of the transcript is unaligned.                                  |
|         | Extra Start/Extra Finish     | The alignment stretches beyond the boundary of the reference annotation. |

### 3.4 Splicing Errors

Splicing errors occur when an intron is correctly marked, but the exact boundaries are not.

| Pattern | Name            | Notes                                                               |
|---------|-----------------|---------------------------------------------------------------------|
|         | One-Site Errors | This occurs when only one of boundaries of the intron is incorrect. |
|         | Two-Site Errors | This occurs when both boundaries of the intron are incorrect.       |

### 3.5 Other Errors

Other errors include producing no alignment and producing an alignment on the wrong strand (not pictured).

## 4 Full Transcript Results

| D           | 0.0   | 0.1   | 0.3   | 0.6   |
|-------------|-------|-------|-------|-------|
| Identity    | 1.00  | 0.94  | 0.84  | 0.72  |
| Blat        | 98.61 | 65.17 | 20.51 | 0.00  |
| BlatX       | 98.80 | 51.56 | 7.10  | 0.00  |
| Est2Genome  | 98.17 | 77.40 | 44.68 | 24.31 |
| Est2Genome+ | 98.25 | 69.37 | 33.16 | 14.26 |
| Exalin      | 99.94 | 81.01 | 50.77 | 29.39 |
| Exonerate   | 99.51 | 69.15 | 34.27 | 13.13 |
| ExonerateCG | 57.82 | 42.37 | 23.23 | 9.13  |
| ExonerateDG | 95.01 | 66.62 | 32.55 | 11.84 |
| GMap        | 99.82 | 82.38 | 48.55 | 19.73 |
| GeneSeqer   | 93.79 | 70.75 | 37.19 | 17.54 |
| HiSim4      | 97.51 | 77.10 | 35.17 | 4.40  |
| Pairagon    | 99.92 | 90.12 | 67.76 | 32.50 |
| PairagonX   | 99.20 | 89.21 | 68.50 | 43.30 |
| Sim4        | 99.78 | 81.80 | 39.48 | 4.59  |
| Sim4+       | 99.84 | 78.76 | 35.85 | 4.46  |
| Spaln       | 98.66 | 84.56 | 55.27 | 27.67 |
| SpalnX      | 98.60 | 84.40 | 59.59 | 37.67 |
| Spidey      | 92.57 | 49.17 | 13.75 | 0.72  |
| SpideyX     | 31.95 | 21.76 | 11.90 | 3.92  |
| Splign      | 97.52 | 80.23 | 35.33 | 0.71  |
| SplignX     | 97.44 | 80.20 | 49.59 | 13.11 |
| Xat         | 95.01 | 77.60 | 47.92 | 27.81 |

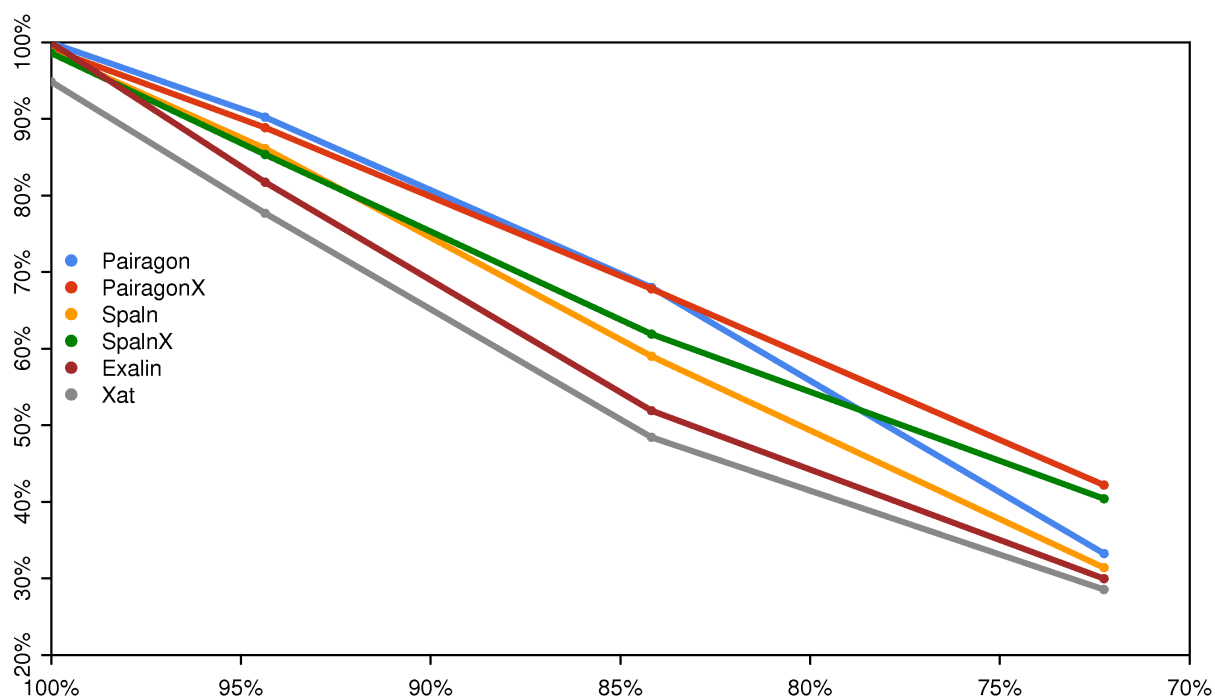

## 5 Timing Data

Average runtime over all alignments in Experiment 1, as reported by the UNIX time command.

| Program    | Time [s] |
|------------|----------|
| Sim4       | 0.00     |
| Splign     | 0.01     |
| GMap       | 0.02     |
| Spaln      | 0.02     |
| Spidey     | 0.02     |
| Blat       | 0.10     |
| Xat        | 0.10     |
| Exalin     | 1.55     |
| Exonerate  | 1.57     |
| GeneSeqer  | 1.97     |
| Est2Genome | 2.77     |
| Pairagon   | 89.52    |
| Palma      | 236.30   |
